# Supplementary material
Source: PubMed Central journal article supplement (PMC2951067)
Supplement: 00115.2010_1.pdf [file 00115.2010_1.pdf]

## SUPPLEMENTAL FIGURE LEGENDS

**Supplemental Figure 1.** UFP inhalation concurrent with OVA challenge increased eosinophil infiltration in the lung of OVA/UFP-sensitized mice compared to mice receiving FA at the same time of OVA challenge. **I.** Immunohistochemical staining of major basic protein (MBP) showing that OVA/UFP challenge induced a more prominent eosinophilic inflammation in the lung of OVA/UFP-sensitized animals. Arrows indicate MBP positive cells. **A and C.** Animals were sensitized by OVA alone and challenged with OVA/FA (A) and OVA/UFP (C) inhalation respectively. **B and D.** Animals were sensitized by OVA/UFP and challenged with OVA/FA (B) and OVA/UFP (D) inhalation respectively. **II.** Quantitative analysis of eosinophil infiltration in the lung by morphometry. \* $p < 0.05$  compared to OVA-sensitized, \*\* $p < 0.05$  compared to OVA/FA-challenged in the same sensitization group.

**Supplemental Figure 2.** Histochemical staining (Alcian Blue, pH 2.5/Periodic Acid Schiff sequence) for acidic and neutral mucosubstances (magenta stain; arrows) in mucus cells of the respiratory epithelium (ep) lining the axial airway (aa; generation 5) in the left lung lobe. Increased amounts of intraepithelial mucosubstances are present in the OVA/UFP-sensitized mouse after secondary challenge with OVA plus UFP. Arrows indicate mucus-secreting cells. **A and C.** Animals were sensitized by OVA alone and challenged with OVA/FA (A) and OVA/UFP (C) inhalation respectively. **B and D.** Animals were sensitized by OVA/UFP and challenged with OVA/FA (B) and OVA/UFP (D) inhalation respectively. Pulmonary artery, pa; alveolar parenchyma, ap.

**Supplemental Figure 3.** The high particulate OC content represented a typical traffic-related ambient UFP atmosphere in Los Angeles (see Materials and Methods for chemical analysis).

**Supplemental Figure 4.** Two UFP inhalation exposures during OVA challenge increased BAL eosinophil count and serum OVA-IgG1 level in animals sensitized by OVA/UFP. In a follow up experiment, we assessed whether a shorter inhalation exposure to ambient UFP could produce similar adjuvant effect on the secondary immune response in already sensitized animals. Two-inhalation exposures of OVA/FA or OVA/UFP were given to the animals sensitized by saline, OVA or OVA/UFP. Allergic sensitization, OVA challenge, inhalation exposure to FA or UFP and necropsy were conducted as described in the Materials and Methods. A. BAL eosinophil count. B. OVA-IgG1.  $p < 0.05$  compared to respective saline-sensitization;  $**p < 0.05$  compared to respective OVA-sensitization;  $^{\#}p < 0.05$  compared to respective OVA/FA.

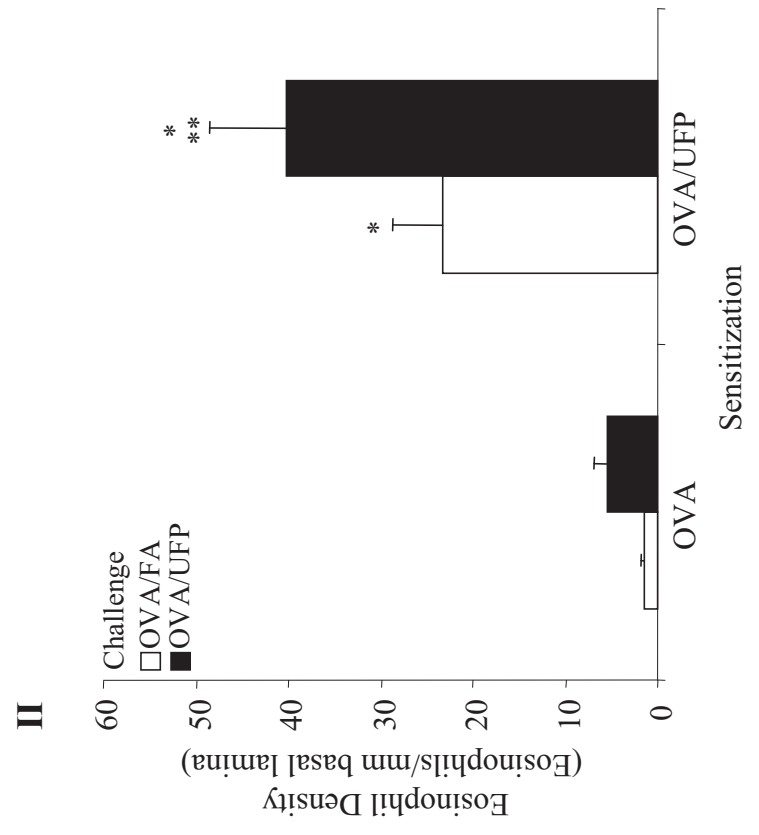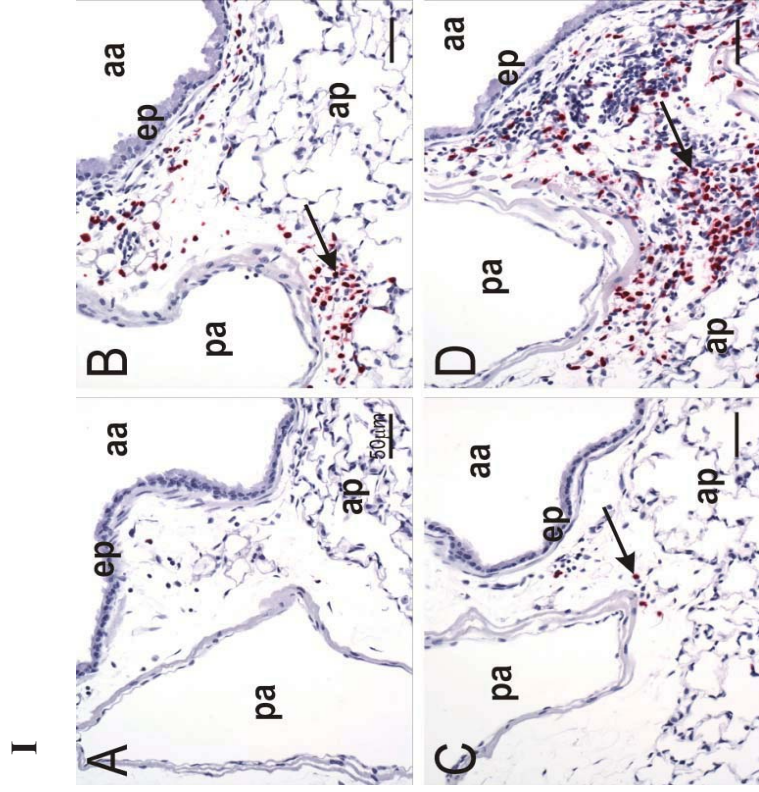

Supplemental Figure 1

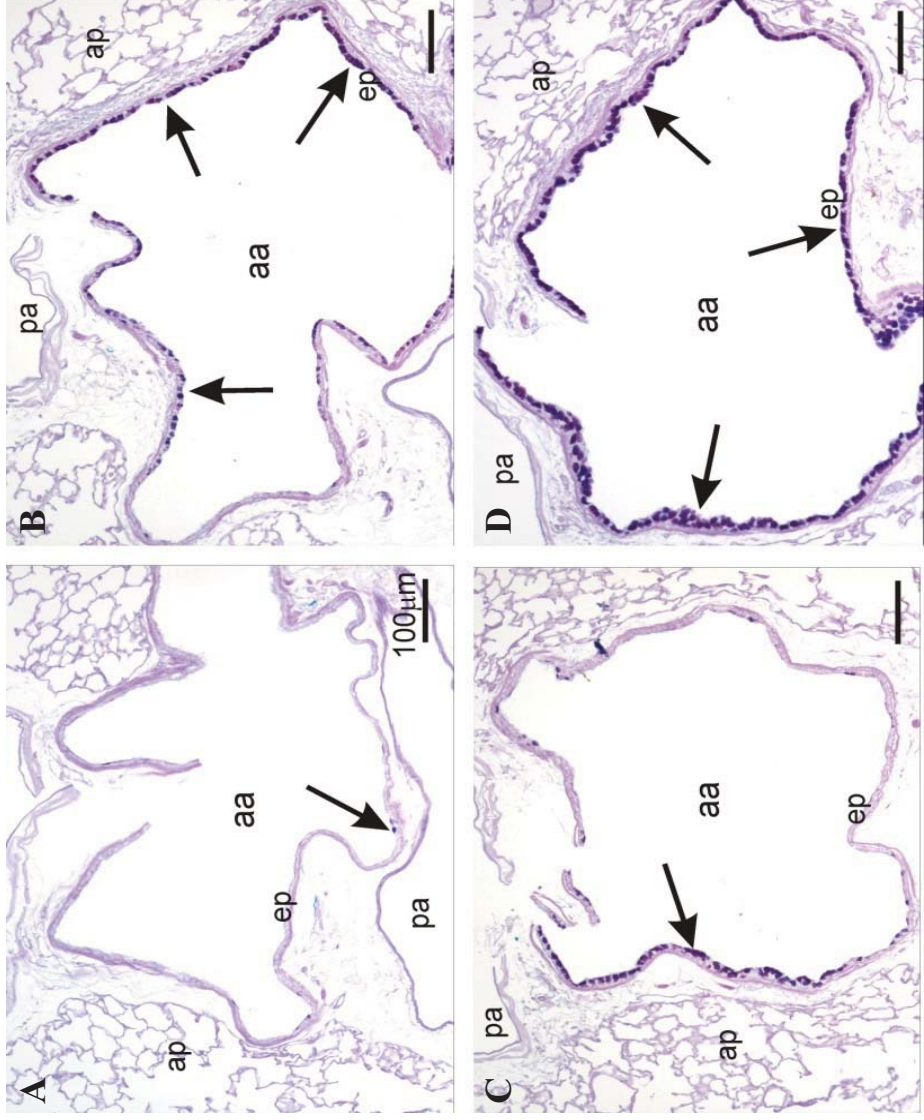

Supplemental Figure 2

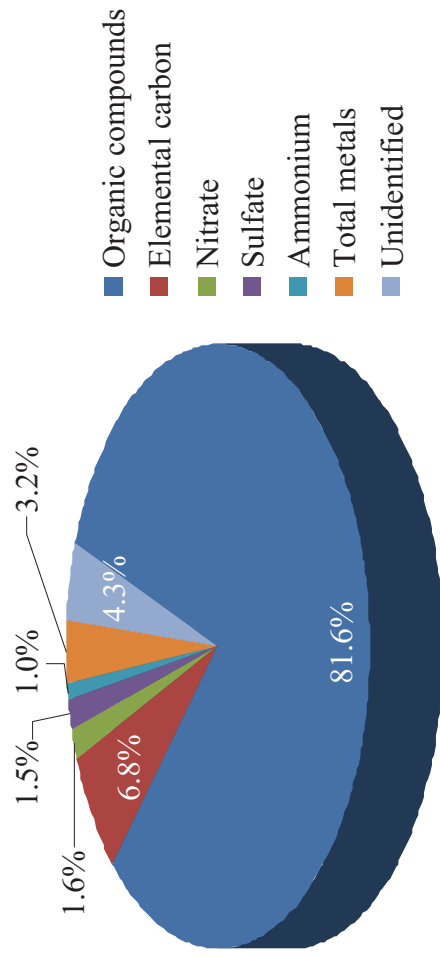

Supplemental Figure 3

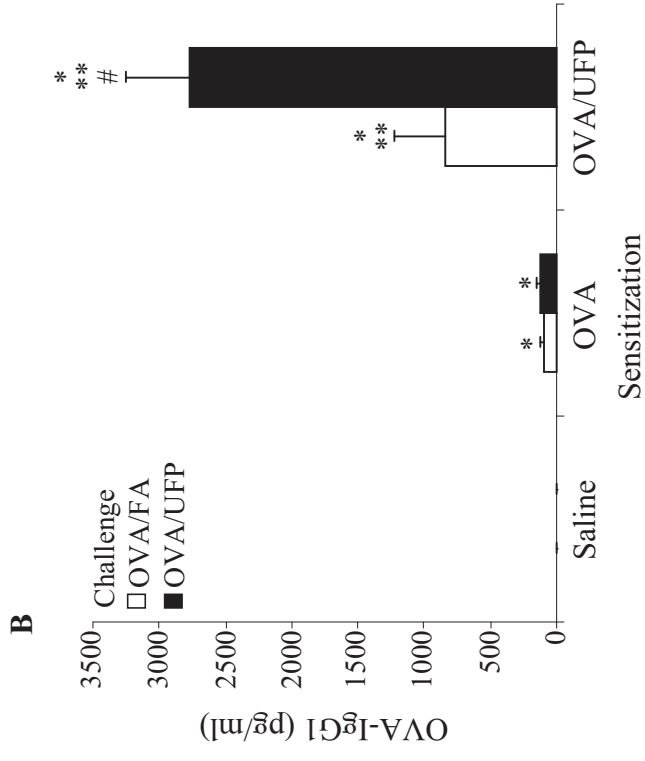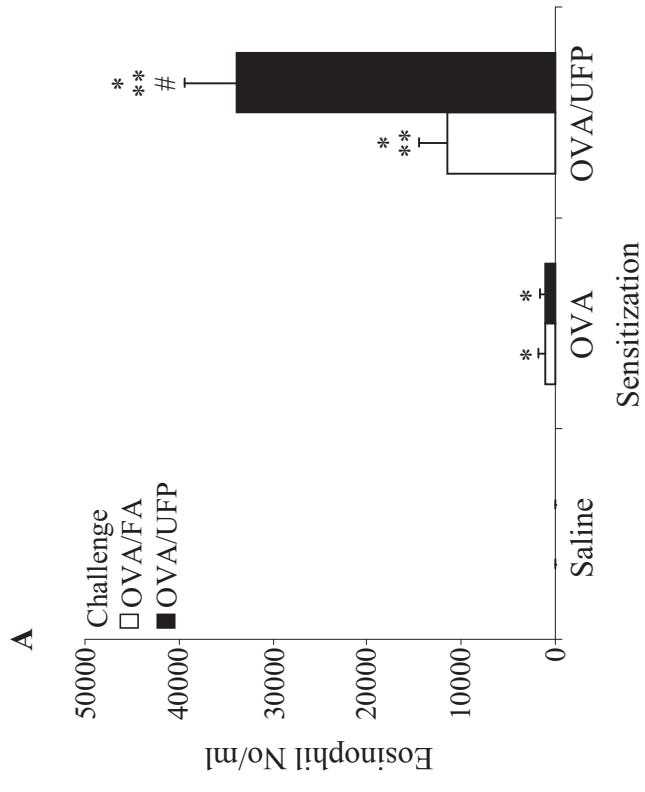

**Supplemental Figure 4**

Supplemental Table 1. Characteristics of Inhalation Exposure in the Mobile Laboratory

| Experimental Parameter                                        |                               |
|---------------------------------------------------------------|-------------------------------|
| Exposure time (dates)                                         | December 3-5, 8 and 9, 2008   |
| Exposure time (hours)                                         | 20 hours                      |
| Total ambient particle no. (particles/cm <sup>3</sup> )       | $(1.15 \pm 0.18) \times 10^4$ |
| No. concentration in FA chamber (particles/cm <sup>3</sup> )  | < 5000                        |
| No. concentration in UFP chamber (Particles/cm <sup>3</sup> ) | $(1.53 \pm 0.39) \times 10^5$ |
| UFP chamber particle enrichment factor                        | $13.3 \pm 2.0$                |
| Mass in UFP exposure chamber ( $\mu\text{g}/\text{m}^3$ )     | $101.3 \pm 5.1$               |
| UFP mass in ambient air ( $\mu\text{g}/\text{m}^3$ )          | $7.6 \pm 0.4$                 |

Animals were exposed to FA or UFP in downtown Los Angeles as described in the Materials and Methods. Values are means  $\pm$  SD.

Supplemental Table 2. Real-time PCR analysis of cytokine and chemokine gene expression in the lung

| Genes          | Change in Gene Expression (Fold)* |                      |                          |                      |                              |                          |
|----------------|-----------------------------------|----------------------|--------------------------|----------------------|------------------------------|--------------------------|
|                | <u>Saline</u> <sup>†</sup>        |                      | <u>OVA2</u> <sup>†</sup> |                      | <u>OVA/UFP2</u> <sup>†</sup> |                          |
|                | OVA/FA <sup>‡</sup>               | OVA/UFP <sup>‡</sup> | OVA/FA <sup>‡</sup>      | OVA/UFP <sup>‡</sup> | OVA/FA <sup>‡</sup>          | OVA/UFP <sup>‡</sup>     |
| KC             | 1.0 ± 0.1                         | 1.2 ± 0.2            | 1.1 ± 0.1                | 1.1 ± 0.1            | 2.3 ± 0.4 <sup>ab</sup>      | 3.5 ± 0.7 <sup>abc</sup> |
| TNF $\alpha$   | 1.0 ± 0.1                         | 1.0 ± 0.1            | 1.0 ± 0.1                | 0.9 ± 0.0            | 1.3 ± 0.1 <sup>ab</sup>      | 1.6 ± 0.1 <sup>ab</sup>  |
| IL-10          | 1.0 ± 0.2                         | 0.8 ± 0.1            | 1.1 ± 0.1                | 1.0 ± 0.2            | 4.1 ± 0.6 <sup>ab</sup>      | 6.3 ± 0.8 <sup>abc</sup> |
| MCP1           | 1.0 ± 0.1                         | 1.3 ± 0.1            | 1.0 ± 0.1                | 1.3 ± 0.1            | 3.2 ± 0.5 <sup>ab</sup>      | 4.0 ± 0.5 <sup>ab</sup>  |
| MIP2           | 1.0 ± 0.1                         | 1.2 ± 0.1            | 1.3 ± 0.1                | 1.3 ± 0.1            | 2.7 ± 0.4 <sup>ab</sup>      | 3.6 ± 0.6 <sup>ab</sup>  |
| IL-6           | 1.0 ± 0.2                         | 1.4 ± 0.2            | 1.0 ± 0.1                | 1.0 ± 0.1            | 2.1 ± 0.3 <sup>ab</sup>      | 2.8 ± 0.4 <sup>ab</sup>  |
| IL-2           | 1.0 ± 0.1                         | 1.0 ± 0.0            | 1.1 ± 0.1                | 1.0 ± 0.0            | 1.7 ± 0.1 <sup>ab</sup>      | 1.9 ± 0.1 <sup>ab</sup>  |
| IL-4           | 1.0 ± 0.1                         | 0.9 ± 0.1            | 1.2 ± 0.1                | 1.2 ± 0.1            | 2.8 ± 0.3 <sup>ab</sup>      | 3.7 ± 0.5 <sup>ab</sup>  |
| Ym2            | 1.0 ± 0.5                         | 107 ± 105            | 47 ± 39                  | 152 ± 136            | 2336 ± 962 <sup>ab</sup>     | 4060 ± 826 <sup>ab</sup> |
| Fizz 1         | 1.0 ± 0.3                         | 1.0 ± 0.1            | 3.1 ± 1.0                | 4.7 ± 2.1            | 43 ± 8.5 <sup>ab</sup>       | 73 ± 10.1 <sup>ab</sup>  |
| GOB5           | 1.0 ± 0.3                         | 0.9 ± 0.3            | 55 ± 38                  | 105 ± 78             | 696 ± 202 <sup>ab</sup>      | 1518 ± 219 <sup>ab</sup> |
| AMcase         | 1.0 ± 0.1                         | 2.0 ± 0.4            | 1.2 ± 0.2                | 1.6 ± 0.5            | 13 ± 5.6 <sup>ab</sup>       | 8.3 ± 2.5 <sup>ab</sup>  |
| $\beta$ -actin | 1.0 ± 0.0                         | 0.9 ± 0.0            | 0.9 ± 0.0                | 0.9 ± 0.0            | 1.0 ± 0.0                    | 1.0 ± 0.0                |

Values are means  $\pm$  SEM. \*Relative to saline sensitization followed by OVA/FA challenge; <sup>†</sup>allergic sensitization; <sup>‡</sup>challenge <sup>a</sup>Significantly different from respective saline sensitization group, ( $p < 0.05$ ), <sup>b</sup>significantly different from respective OVA sensitization group, ( $p < 0.05$ ), <sup>c</sup>significantly different from respective filtered air group, ( $p < 0.05$ ).



Supplemental Table 3. Characterization of ambient UFP

| <b>Particle Properties</b>                             | <b>Results</b> |
|--------------------------------------------------------|----------------|
| Endotoxin (u/ml)                                       | 0.5            |
| Oxidant Potential (DTT consumption, nmol/ $\mu$ g/min) | 0.05           |

Endotoxin level was measured by LAL assay. DTT assay was conducted
